# Supplementary material for: Selective oxidative degradation of azo dyes by hydrogen peroxide catalysed by manganese(ii) ions
Source: Royal Society of Chemistry journal article supplement (doi:10.1039/c6ra23067a), 2016-01-01
Supplement: c6ra23067a1.pdf [file c6ra23067a1.pdf]

### Electronic Supplementary Information

### Figures and Legends

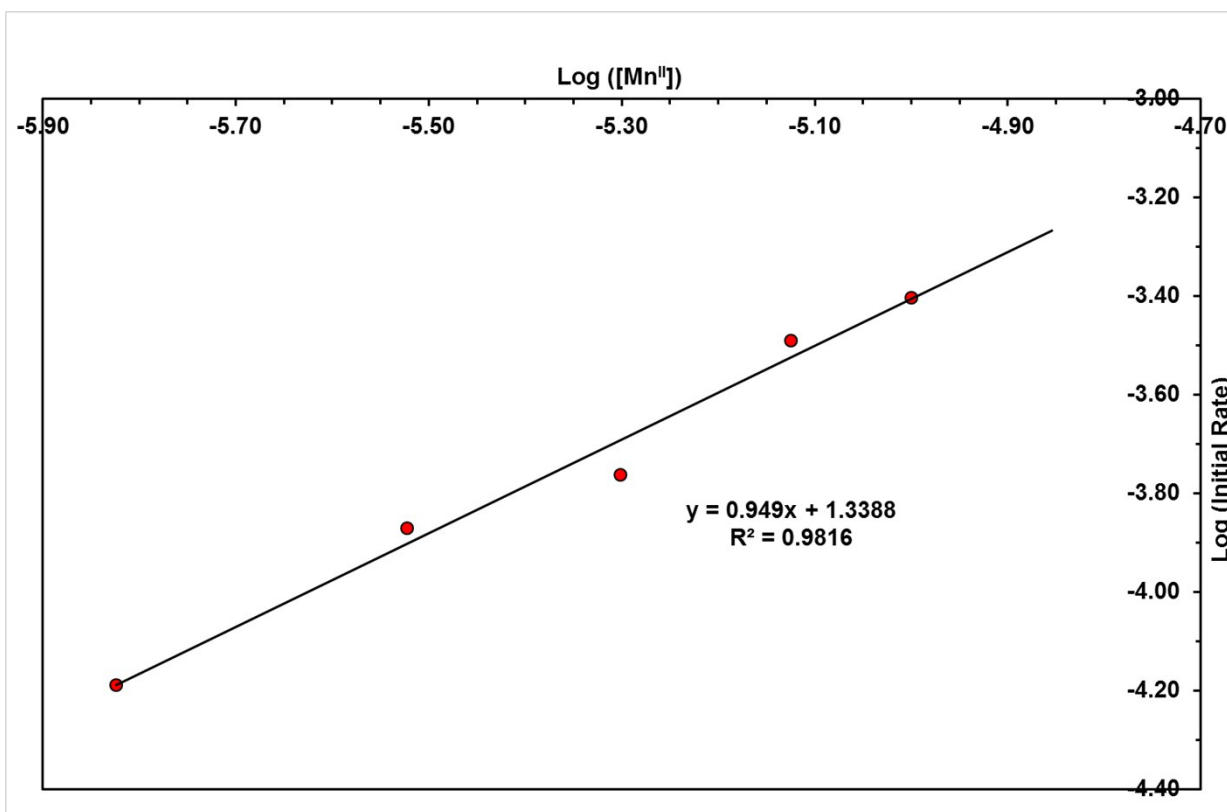

ESI1 Log – log lot of initial rate of CAL bleaching vs  $[Mn^{II}]$ . All conditions as for Fig. 2.

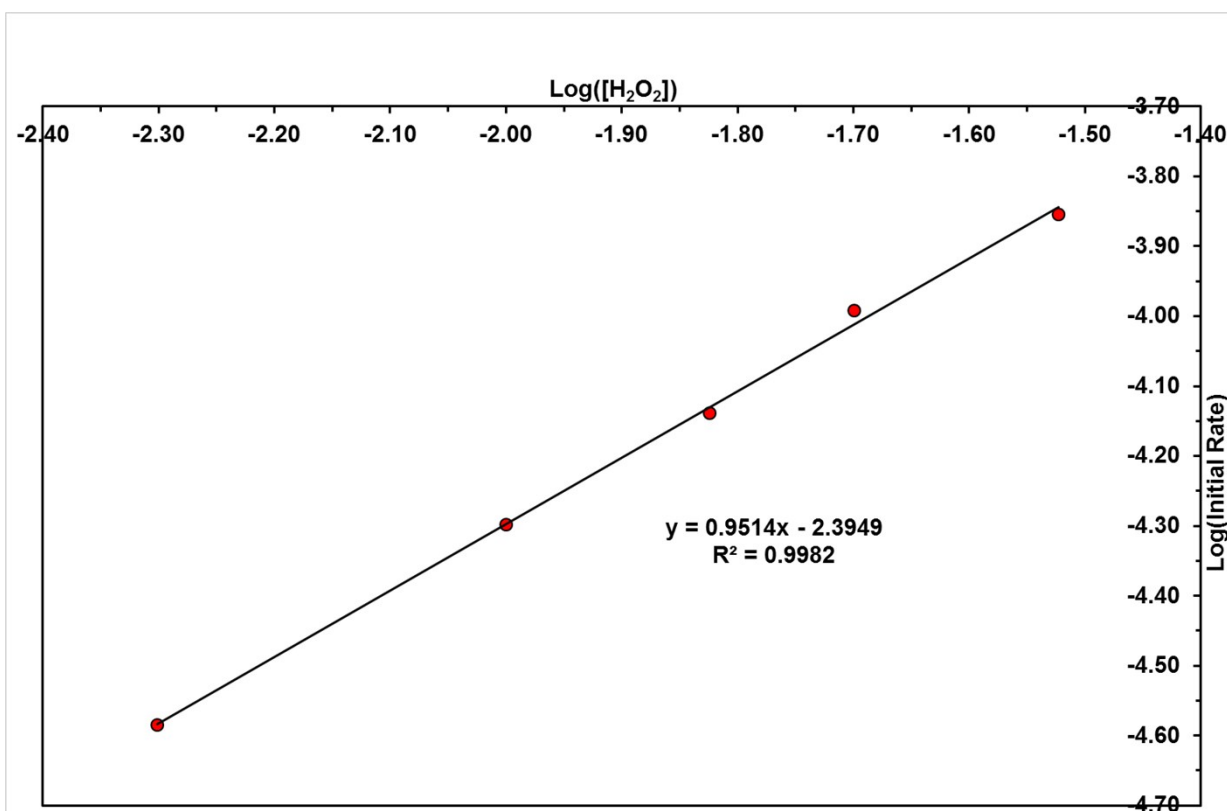

ESI2 Log – log plot of initial rate of CAL bleaching vs  $[H_2O_2]$ . All conditions as for Fig. 2.

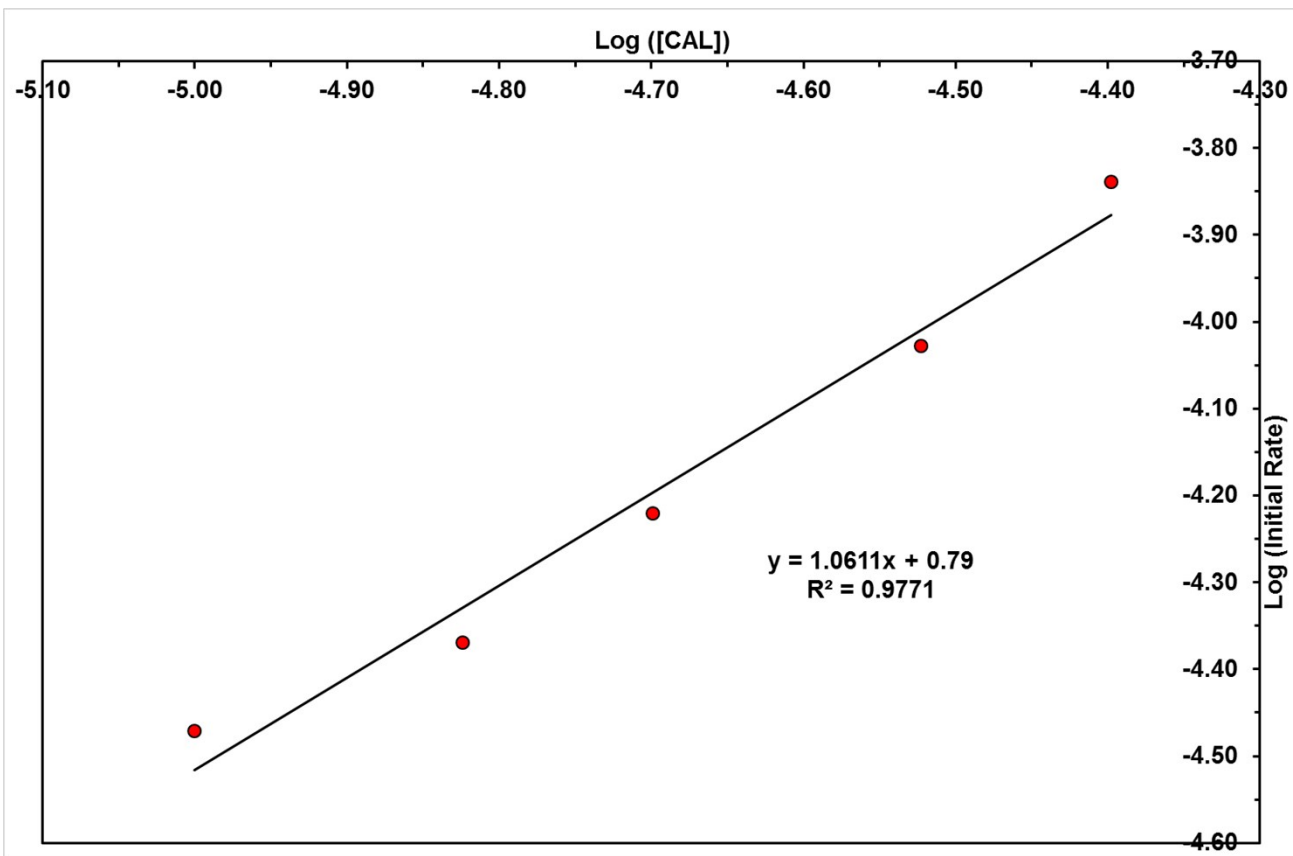

ES13 Log – log lot of initial rate of CAL bleaching vs [CAL]. All conditions as for Fig. 2.

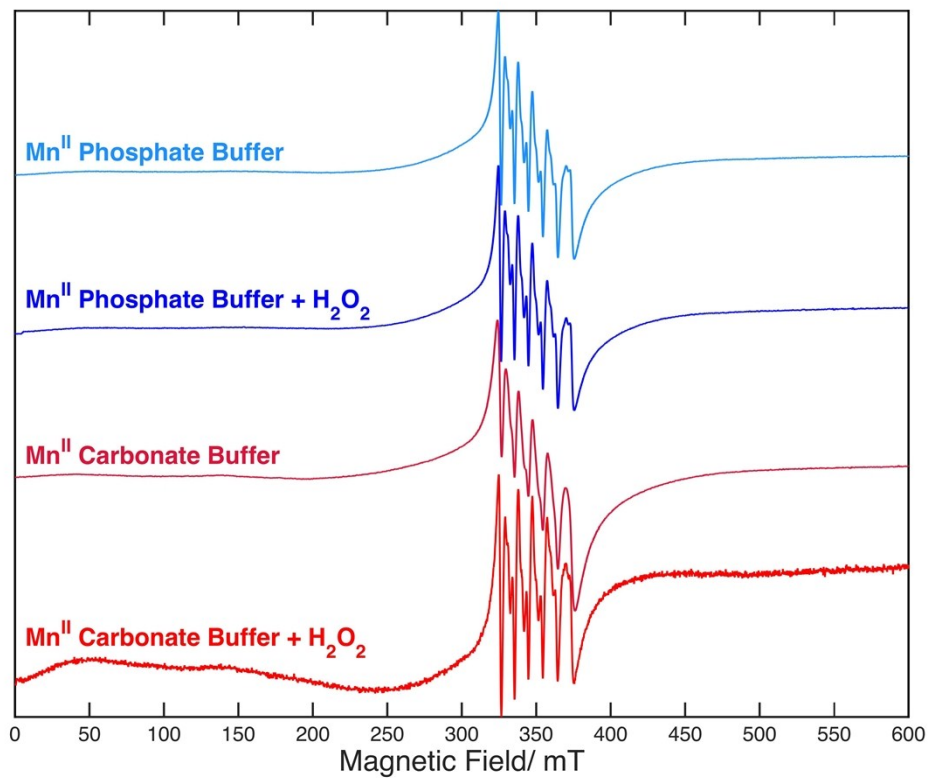

ES14 X-band EPR spectra of MnCl<sub>2</sub>·4H<sub>2</sub>O (100 μM) at pH 8.0 (50 mM, phosphate buffer) or pH 9.0 (50 mM, carbonate buffer) and after the addition of H<sub>2</sub>O<sub>2</sub> (50.0 mM). EPR conditions: Perpendicular mode, 9.65 GHz, 10 K, 1 mW microwave power, modulation amplitude 20 mT.

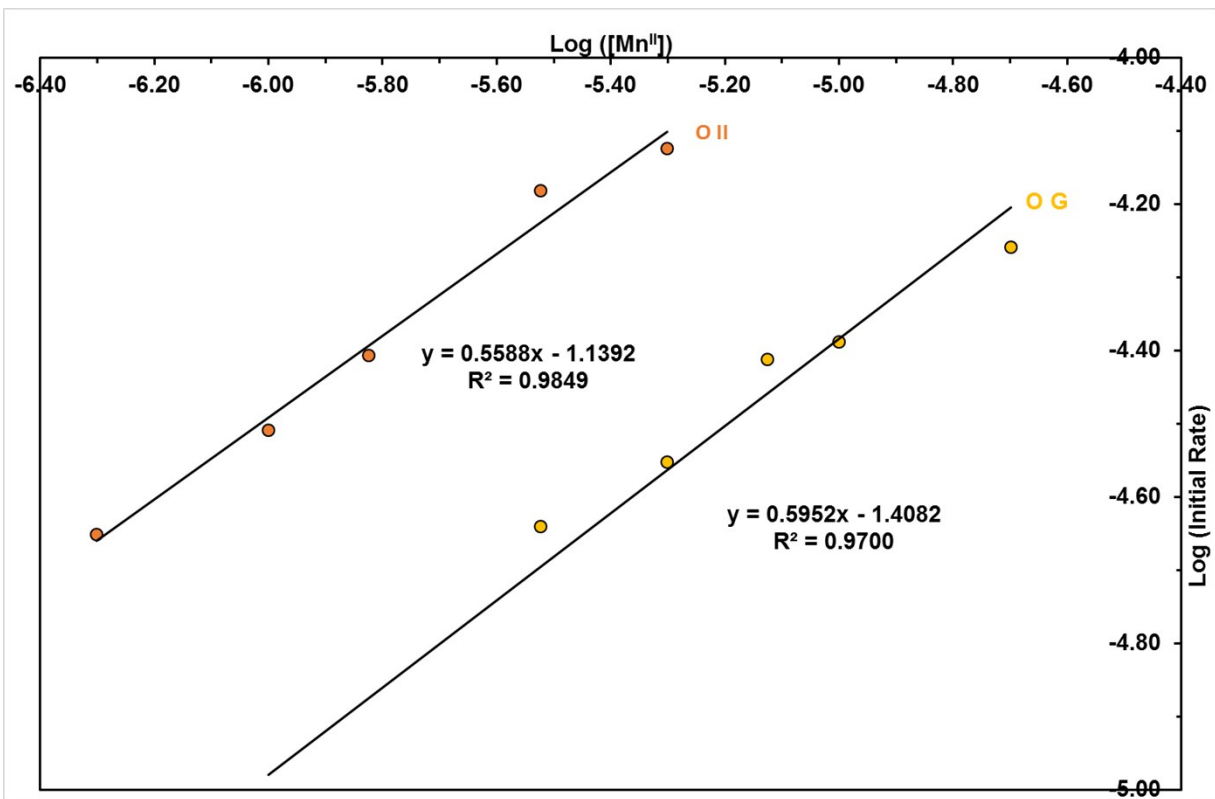

ESI5 Log – log plot of initial rate of O II and O G bleaching vs [Mn<sup>II</sup>]. All conditions as for Fig. 12 and Fig. 13 respectively.

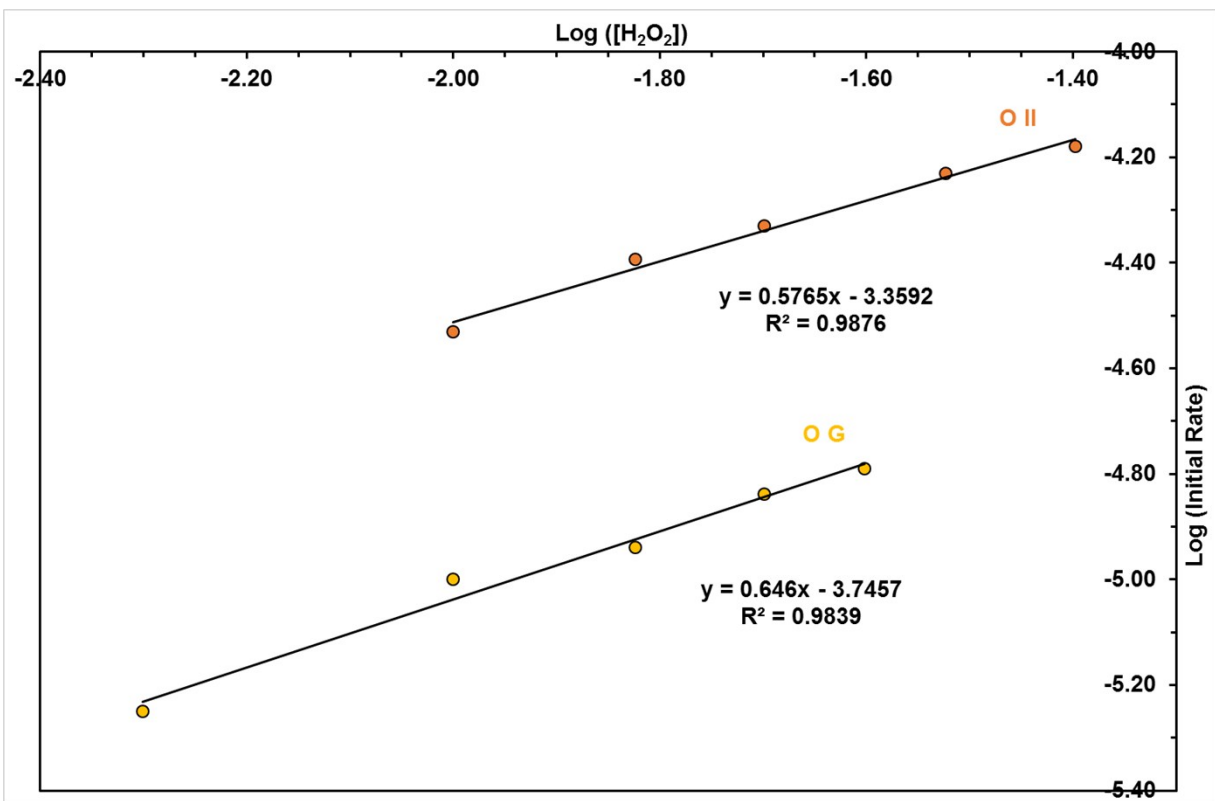

ESI6 Log – log plot of initial rate of O II and O G bleaching vs [H<sub>2</sub>O<sub>2</sub>]. All conditions as for Fig. 12 and Fig. 13 respectively.

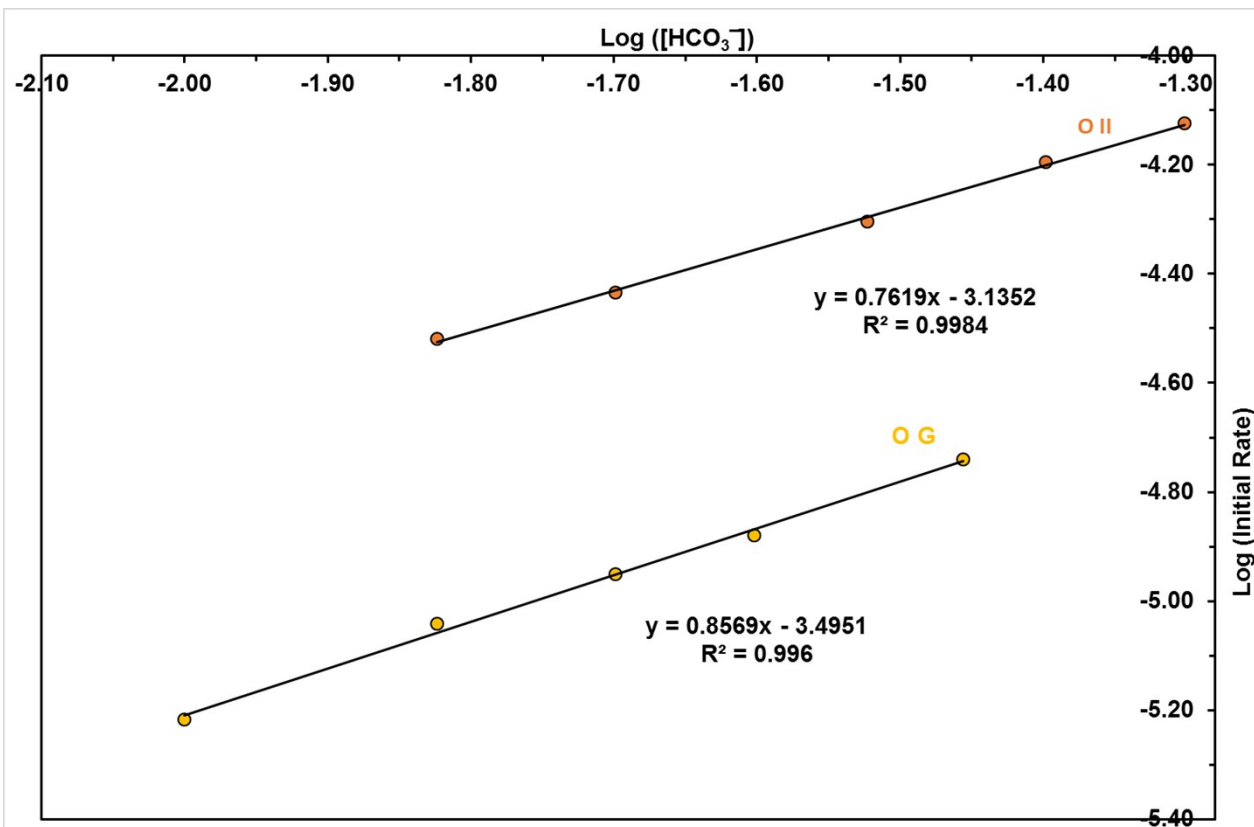

ESI7 Log – log plot of initial rate of O II and O G bleaching vs [HCO<sub>3</sub><sup>-</sup>]. All conditions as for Fig. 12 and Fig. 13 respectively.

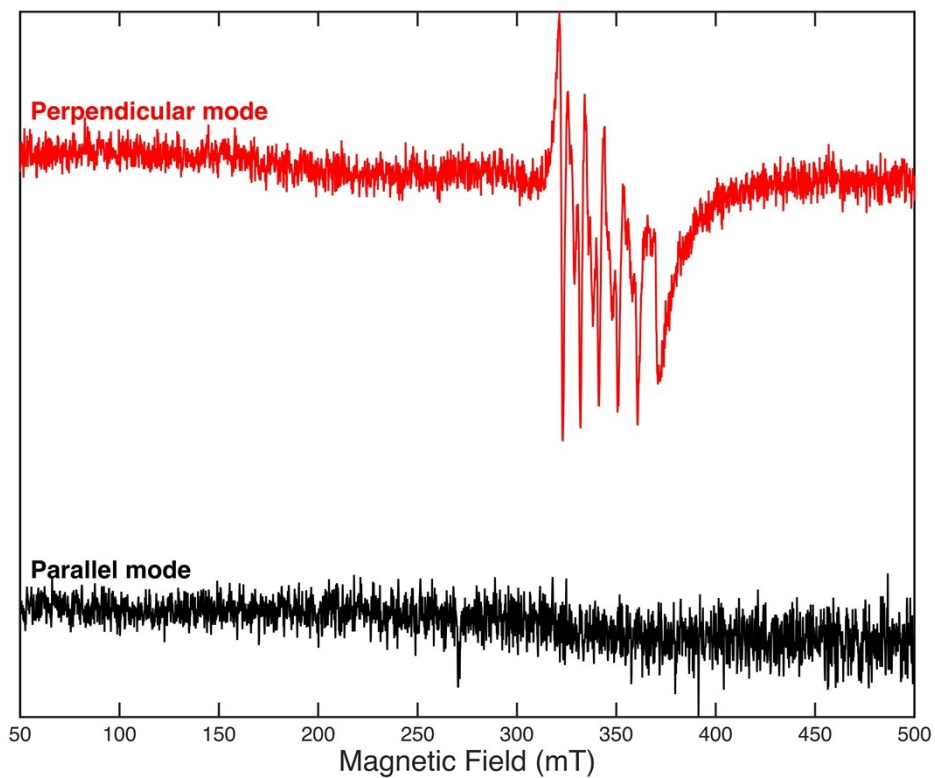

ESI8 X-band EPR spectra of MnCl<sub>2</sub>·4H<sub>2</sub>O (100 μM), H<sub>2</sub>O<sub>2</sub> (50.0 mM) and O II (0.100 mM) at pH 9.0 (50 mM, carbonate buffer). EPR conditions: Perpendicular and parallel modes, 9.65 and 9.41 GHz, 10 K, 2 mW microwave power, modulation amplitude 0.5 mT.

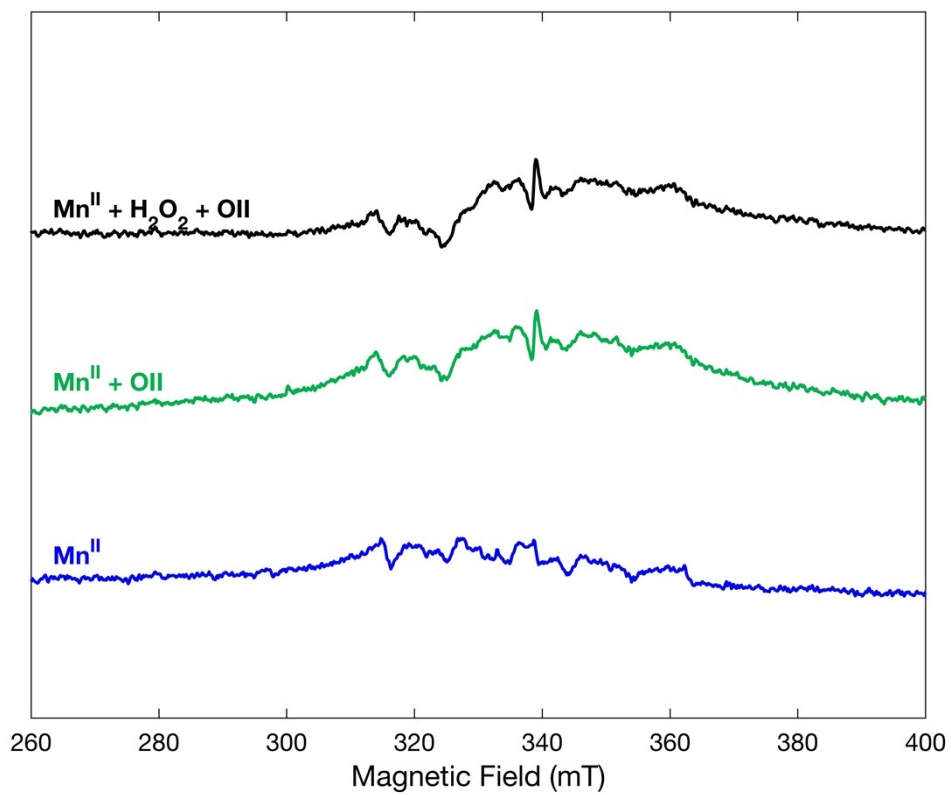

ES19 X-band EPR spectra of MnCl<sub>2</sub>·4H<sub>2</sub>O (100 μM) and in the presence of H<sub>2</sub>O<sub>2</sub> (50.0 mM) or O II (0.100 mM) or both H<sub>2</sub>O<sub>2</sub> (50.0 mM) and O II (0.100 mM) at pH 9.0 (50 mM, carbonate buffer) in perpendicular (9.5 GHz) mode. EPR conditions: 10 K, 0.2 mW microwave power, modulation amplitude 0.7 mT.

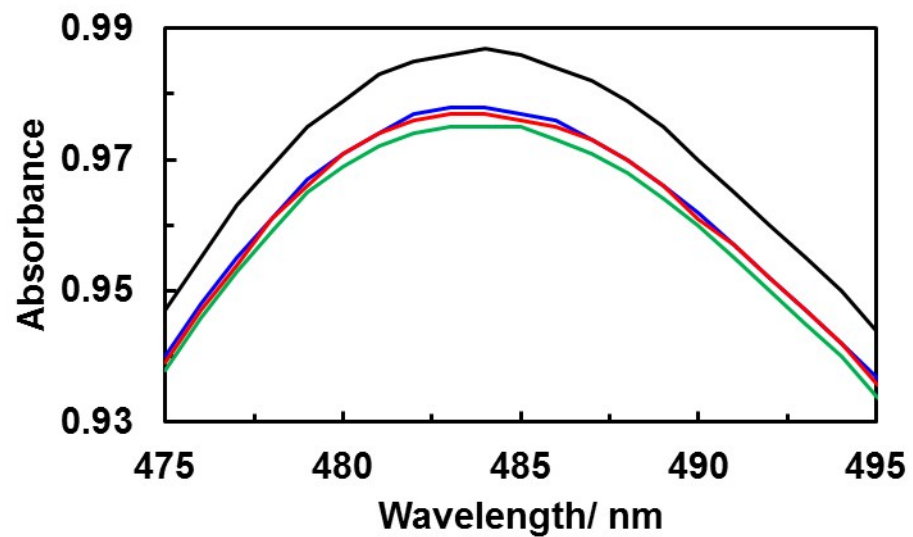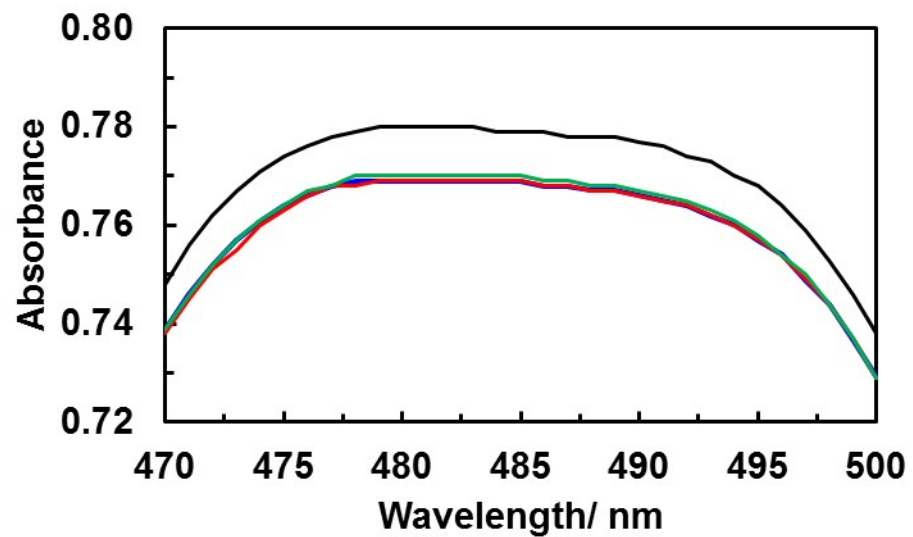

ESI10 Change in absorbance maxima of O II (top) and (bottom) O G (black lines) on addition of 10.0-60.0  $\mu\text{M}$   $\text{MnCl}_2 \cdot 4\text{H}_2\text{O}$  to 0.0500 mM dye at  $20 \pm 1^\circ\text{C}$ . The pH was  $9.0 \pm 0.1$  (50 mM, carbonate buffer).

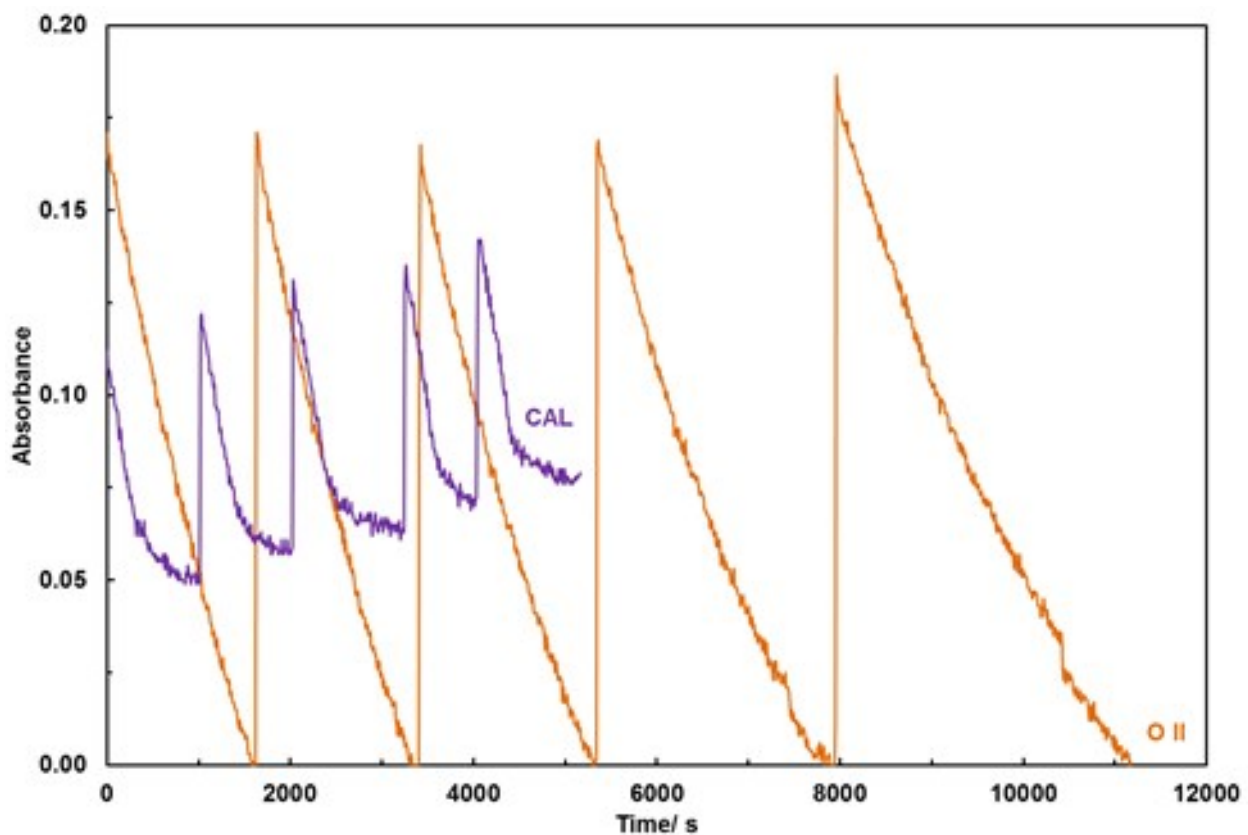

ESI11 The change in absorbance of CAL at pH  $8.0 \pm 0.1$  (50 mM, phosphate buffer) and O II at pH  $9.0 \pm 0.1$  (50 mM, carbonate buffer) with time monitored at 540 nm and 484 nm respectively and at  $20 \pm 1^\circ\text{C}$  after successive additions of dye (0.100 mM) with  $[\text{MnCl}_2 \cdot 4\text{H}_2\text{O}]$  at  $5.00 \mu\text{M}$ . Initial [dye] and  $[\text{H}_2\text{O}_2]$  were 0.100 mM and 50.0 mM respectively.
